# Supplementary material for: Structural Equation Modeling (SEM) and Temporal Dominance of Sensations (TDS) in the Evaluation of DOC Douro Red Wine’s Sensory Profile
Source: MDPI journal article supplement (doi:10.3390/foods11081168), 2022-04-18
Supplement: s1 [file s1]

**Table S1.** List of descriptors used for the sensory profile of DOC Douro red wines.

|                               |
|-------------------------------|
| <b>Attributes</b>             |
| <b>Visual Examination:</b>    |
| Clarity                       |
| Color Intensity               |
| Hue                           |
| <b>Olfactory Examination:</b> |
| Aromatic Intensity            |
| Floral                        |
| Fruity                        |
| Type of Fruit                 |
| Spices                        |
| Balsamic                      |
| Vegetable                     |
| Empireumatics                 |
| Minerals                      |
| Animals                       |
| Chemicals                     |
| Aromatic Persistence          |
| <b>Taste Examination:</b>     |
| Sweetness                     |
| Alcohol                       |
| Acidity                       |
| Astringency                   |
| Bitterness                    |
| Body                          |
| Balance                       |
| Taste Persistence             |
